# Supplementary material
Source: publisher figshare collection journal article supplement (https://karger.figshare.com/ndownloader/files/22809641)
Supplement: Supplementary file 1 [file 22809641]

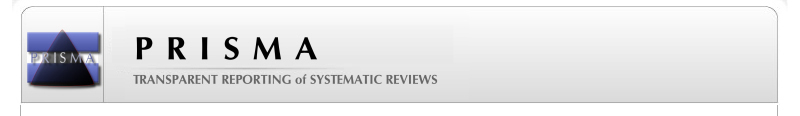
**PRISMA 2009 Flow Diagram**

**Screening**

**Included**

**Eligibility**

**Identification**

Pubmed156; web of science482

Cochrane library42; embase516
(n =1196)

Additional records identified through other sources
(n = 0)

Records after duplicates removed
(n = 820)

Records screened
(n =820)

excluded according to title and abstract(n=782)

Full-text articles assessed for eligibility
(n = 38)

Full-text articles excluded,

Wrong study design: n=9

Wrong population: n=3

Wrong intervention: n=3

Wrong outcomes: n=5

Duplicate data: n=1
(n = 22)

Studies included in qualitative synthesis
(n = 17)

Studies included in quantitative synthesis (meta-analysis)
(n = 17)
